# Supplementary material
Source: MDPI journal article supplement (https://www.mdpi.com/2073-4344/11/6/731)
Supplement: s1 [file s1]

## Supplementary Materials

# Studies of Nickel/Samarium-Doped Ceria for Catalytic Partial Oxidation of Methane and Effect of Oxygen Vacancy

Andrew C. Chien <sup>1,2,\*</sup>, Nicole J. Ye <sup>1</sup>, Chao-Wei Huang <sup>3</sup> and I-Hsiang Tseng <sup>1</sup>

<sup>1</sup> Department of Chemical Engineering, Feng Chia University, Taichung 40724, Taiwan; snoopy0302.0302@gmail.com (N.J.Y.); ihtseng@fcu.edu.tw (I.-H.T.)

<sup>2</sup> Green Energy Development Center, Feng Chia University, Taichung 40724, Taiwan

<sup>3</sup> Department of Chemical and Materials Engineering, National Kaohsiung University of Science and Technology, Kaohsiung 80778, Taiwan; huangcw@nku.edu.tw

\* Correspondence: cyinchien@fcu.edu.tw; Tel.: +8-86-424-517-250; ext. 3691; Fax: +8-86-424-510-890

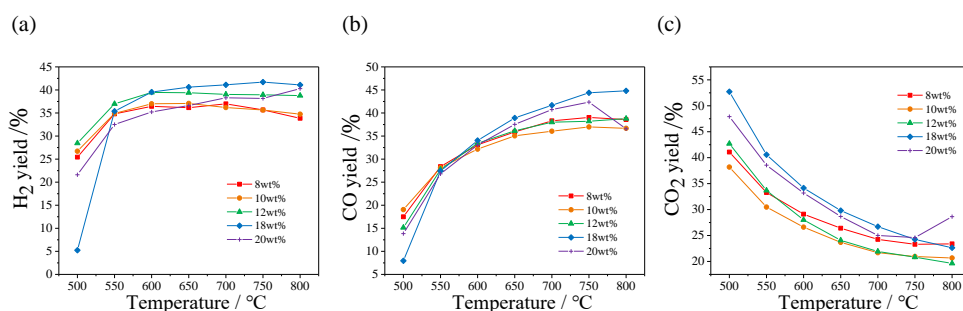

**Figure S1.** Product yield of on the  $\text{Sm}_{0.1}\text{Ce}_{0.9}\text{O}_{1.95}$  catalyst with various Ni contents in the gas stream,  $\text{CH}_4/\text{O}_2$  (10/5, vol.%) in Ar at a total flow rate of 30 ml min<sup>-1</sup> (calculated by: 100% x practical yield/ theoretical yield).

**Citation:** Chien, A.C.; Ye, N.J.; Huang, C.-W.; Tseng, I.-H. Studies of Nickel/Samarium-Doped Ceria for Catalytic Partial Oxidation of Methane and Effect of Oxygen Vacancy. *Catalysts* **2021**, *11*, 731. <https://doi.org/10.3390/catal11060731>

Academic Editor: Sónia Carabineiro

Received: 6 May 2021

Accepted: 10 June

Published: date

**Publisher's Note:** MDPI stays neutral with regard to jurisdictional claims in published maps and institutional affiliations.

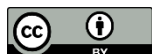

**Copyright:** © 2021 by the authors. Licensee MDPI, Basel, Switzerland. This article is an open access article distributed under the terms and conditions of the Creative Commons Attribution (CC BY) license (<http://creativecommons.org/licenses/by/4.0/>).

**S2. Increasing NiO loadings usually gives rise to a bigger particles size with a sharper XRD peak, as shown on the figure below.**

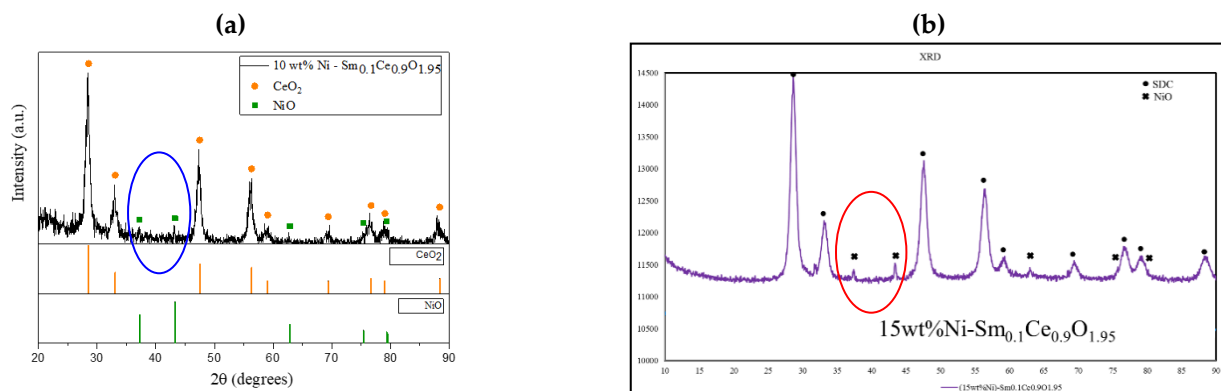

**Figure 2.** XRD pattern on (a) 10 wt. % Ni/SDC and (b) 15 wt.% Ni/SDC catalyst.

**S3. XPS result shows that Ce contains different valence state because of Sm doping.**  
 $\text{Ce}^{4+} = v, v'', v''', u, u'', u'''; \text{Ce}^{3+} = v_0, v', u_0, u'$

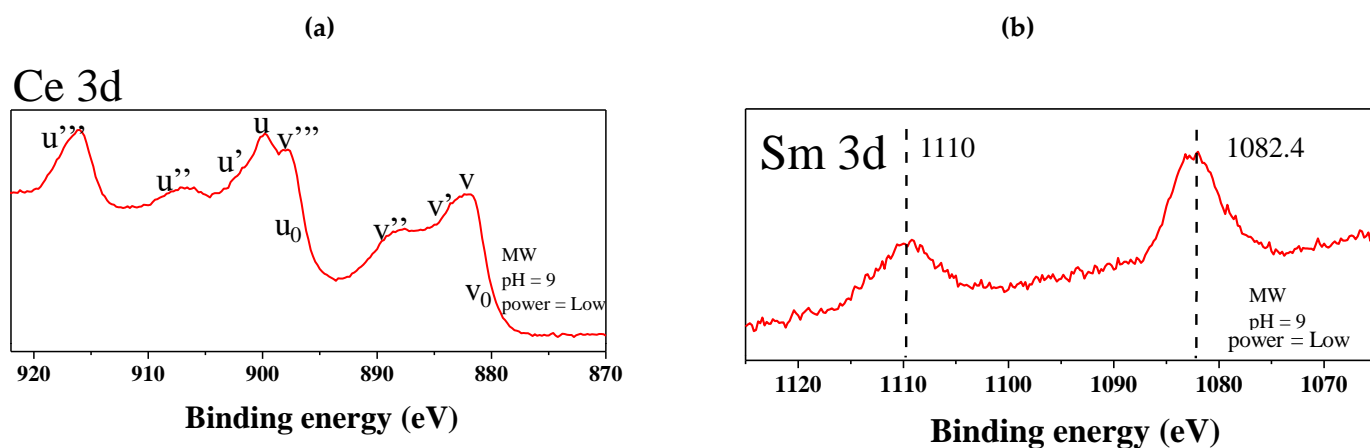

**Figure S3.** Experimental Ce3d and Sm 3d XPS spectra on 10 wt.% Ni/SDC (Sm/Ce=1/9).

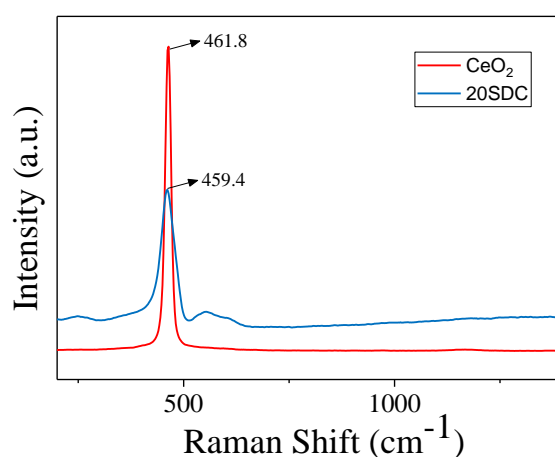

**Figure S4.** Raman analysis on the commercial  $\text{CeO}_2$  and as-synthesized SDC.
